# Supplementary material
Source: PubMed Central journal article supplement (PMC6584709)
Supplement: jamasurg-154-558-s002.pdf [file jamasurg-154-558-s002.pdf]

## Data Sharing Statement

Brummett. Effect of an Activated Charcoal Bag on Disposal of Unused Opioids After an Outpatient Surgical Procedure. *JAMA Surg.* Published March 27, 2019. 10.1001/jamasurg.2019.0155

### Data

**Data available:** Yes

**Data types:** Deidentified participant data

**How to access data:** [cbrummet@med.umich.edu](mailto:cbrummet@med.umich.edu)

**When available:** With publication

### Supporting Documents

**Document types:** None

### Additional Information

**Who can access the data:** Anyone requesting the data

**Types of analyses:** For any purpose

**Mechanisms of data availability:** With investigator support
